# Supplementary material for: Contribution to the crystal chemistry of lead-antimony sulfosalts: systematic Pb-versus-Sb crossed substitution in the plagionite homologous series, Pb&lt;sub&gt;2&lt;i&gt;N&lt;/i&gt; − 1&lt;/sub&gt;(Pb&lt;sub&gt;1 − &lt;i&gt;x&lt;/i&gt;&lt;/sub&gt;Sb&lt;sub&gt;&lt;i&gt;x&lt;/i&gt;&lt;/sub&gt;)&lt;sub&gt;2&lt;/sub&gt;(Sb&lt;sub&gt;1 − &lt;i&gt;x&lt;/i&gt;&lt;/sub&gt;Pb&lt;sub&gt;&lt;i&gt;x&lt;/i&gt;&lt;/sub&gt;)&lt;sub&gt;2&lt;/sub&gt;Sb&lt;sub&gt;6&lt;/sub&gt;S&lt;sub&gt;13+2&lt;i&gt;N&lt;/i&gt;&lt;/sub&gt;
Source: Copernicus journal article supplement (doi:10.5194/ejm-32-623-2020), 2020-11-14
Supplement: Supplementary file 1 [file ejm-32-623-2020-supplement.zip]

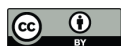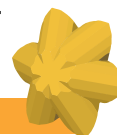

## *Supplement of*

# **Contribution to the crystal chemistry of lead-antimony sulfosalts: systematic Pb-versus-Sb crossed substitution in the plagionite homologous series, $\text{Pb}_{2N-1}(\text{Pb}_{1-x}\text{Sb}_x)_2(\text{Sb}_{1-x}\text{Pb}_x)_2\text{Sb}_6\text{S}_{13+2N}$**

**Yves Moëlo and Cristian Biagioni**

*Correspondence to:* Yves Moëlo ([yves.moelo@cnrs-imn.fr](mailto:yves.moelo@cnrs-imn.fr))

- [ejm-32-623-2020-supplement-title-page.pdf](#)
- [MoëloSM1fülöppiteF1.cif](#)
- [MoëloSM2fülöppiteF2.cif](#)
- [MoëloSM3fülöppiteF3.cif](#)
- [MoëloSM4plagioniteP1.cif](#)
- [MoëloSM5plagioniteP2.cif](#)
- [MoëloSM6plagioniteP3.cif](#)
- [MoëloSM7semseyiteS1.cif](#)
- [MoëloSM8semseyiteS2.cif](#)

The copyright of individual parts of the supplement might differ from the CC BY 4.0 License.
